# Supplementary material
Source: PubMed Central journal article supplement (PMC2781379)
Supplement: 00579.2009_1.pdf [file 00579.2009_1.pdf]

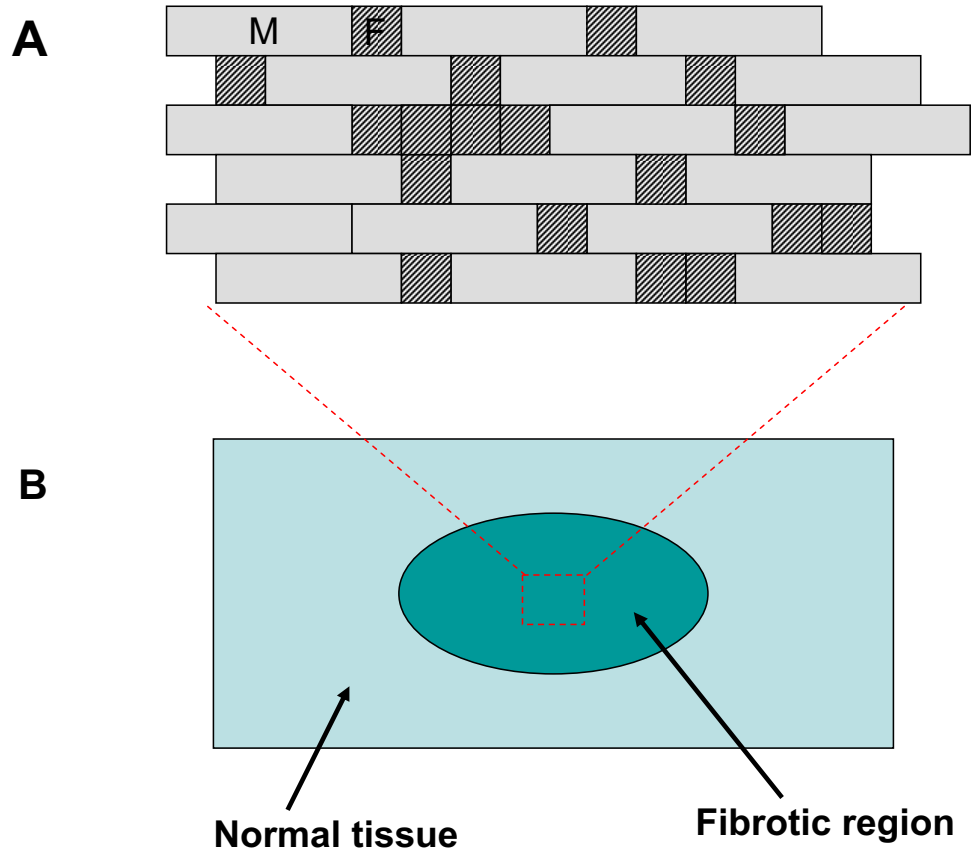

**Supplemental Figure**

## Online Supplement

### Table

**Comparison of Transmembrane Action Potential Parameters Recorded With Microelectrode in Adult and Aged Rat Hearts**

|                                       | Adult            |                                       |    | Aged            |                                      |    |
|---------------------------------------|------------------|---------------------------------------|----|-----------------|--------------------------------------|----|
|                                       | Baseline<br>N=25 | H <sub>2</sub> O <sub>2</sub><br>N=17 | P  | Baseline<br>N=8 | H <sub>2</sub> O <sub>2</sub><br>N=8 | P  |
| Resting Membrane Potential (mV)       | -83±1            | -85±1                                 | NS | -83±3           | -83±3                                | NS |
| APA(mV) at PCL of 250ms               | 108±11           | 111±5                                 | NS | 107±8           | 111±7                                | NS |
| APD90 at a PCL of 250ms (ms)          | 86±10            | 83±2                                  | NS | 104±5           | 105±4                                | NS |
| APD90 at a PCL of 200ms (ms)          | 86±9             | 83±2                                  | NS | 101±4           | 100±4                                | NS |
| APD90 at a PCL of 150ms (ms)          | 83±9             | 82±2                                  | NS | 92±3            | 91±3                                 | NS |
| APD90 at a PCL of 130ms (ms)          | 75±7             | 76±3                                  | NS | 83±3            | 84±3                                 | NS |
| APD50 at a PCL of 250ms (ms)          | 23±7             | 26±6                                  | NS | 34±4            | 35±2                                 | NS |
| APD50 at a PCL of 200ms (ms)          | 22±5             | 29±7                                  | NS | 35±4            | 36±3                                 | NS |
| APD50 at a PCL of 150ms (ms)          | 22±3             | 32±8                                  | NS | 35±4            | 34±3                                 | NS |
| APD50 at a PCL of 130ms (ms)          | 22±4             | 29±7                                  | NS | 30±3            | 32±3                                 | NS |
| dV/dt(max) (V/S) at PCL of 250ms      | 211±25           | 235±19                                | NS | 190±17          | 187±22                               | NS |
| <b>Max Slope of Restitution Curve</b> |                  |                                       |    |                 |                                      |    |
| APD90                                 | 0.9±0.5          | 0.9±0.3                               | NS | 1.3±0.5         | 1.2±0.5                              | NS |
| APD50                                 | 0.3±0.1          | 0.3±0.2                               | NS | 0.4±0.1         | 0.4±0.2                              | NS |

APA; action potential amplitude, APD90 and 50; action potential duration of 90% and 50% repolarization respectively; dV/dt(max) is maximum depolarization rate of phase zero (upstroke) of AP in (volt/sec); N= number of hearts.

### **Supplemental Figure Legend**

*Schematic presentation of the distribution of myocyte (M) to fibroblast (F) couplings in a 2D simulated tissue.* Panel A shows the details of random F distribution in the fibrotic zone of a 2D tissue shown in panel B, with the central elliptic region representing the fibrotic zone. The F-M ratio was systematically changed in the fibrotic zone and its effect on EAD and triggered activity evaluated as shown in Figure 8.
